# Supplementary material
Source: publisher site journal article supplement (https://www.dovepress.com/article/567643)
Supplement: Supplementary file 1 [file 567643_Supplementary%20Material.docx]

**Supplementary Material**

**Supplementary table 1. Baseline characteristics of patients in the TCGA-LIHC cohort.**

| **Clinical and Pathological Data of Each Patient** | |
| --- | --- |
| **Characteristic** | **Value** |
| **Sex (Male/Female), n (%)** | 240 (67.6) / 115 (32.4) |
| **Age ≤50 / >50, n (%)** | 73 (20.6) / 282 (79.4) |
| **HBV infection Yes/No/Unknown, n (%)** | 134 (37.7) / 22 (6.2) / 199 (56.1) |
| **HCV infection Yes/No/Unknown, n (%)** | 99 (27.9) / 57 (16.1) / 199 (56.1) |
| **Alcohol Yes/No/Unknown, n (%)** | 113 (31.8) / 232 (65.4) / 10 (2.8) |
| **Child–Pugh class A / B or C / Unknown, n (%)** | 211 (59.4) / 22 (6.2) / 122 (34.4) |
| **AFP (ng/mL) ≤300 / >300 / Unknown, n (%)** | 206 (58.0) / 63 (17.7) / 86 (24.2) |
| **Edmondson grade I+II / III+IV / Unknown, n (%)** | 227 (63.9) / 128 (36.1) / 0 (0) |
| **Vascular invasion Yes/No/Unknown, n (%)** | 102 (28.7) / 199 (56.1) / 54 (15.2) |
| **AJCC stage I+II / III+IV, n (%)** | 263 (74.1) / 92 (25.9) |

**Supplementary table 2. Baseline characteristics of patients in the GSE14520 cohort.**

| **Clinical and Pathological Data of Each Patient** | |
| --- | --- |
| **Characteristic** | **Value** |
| **Sex (Male/Female), n (%)** | 175 (86.2) / 28 (13.8) |
| **Age ≤50 / >50, n (%)** | 100 (49.3) / 103 (50.7) |
| **HBV infection Yes/No/Unknown, n (%)** | 195 (96.0) / 6 (3.0) / 2 (1.0) |
| **Cirrhosis Yes/No, n (%)** | 187 (92.1) / 16 (7.9) |
| **AFP (ng/mL) ≤300 / >300 / Unknown, n (%)** | 108 (53.2) / 92 (45.3) / 3 (1.5) |
| **Tumor size ≤5 cm / >5 cm, n (%)** | 134 (66.0) / 69 (34.0) |
| **Tumor number Single/Multiple, n (%)** | 163 (80.3) / 40 (19.7) |
| **BCLC stage A / B+C, n (%)** | 157 (77.3) / 46 (22.7) |
| **AJCC stage I+II / III+IV, n (%)** | 161 (79.3) / 42 (20.7) |

**Supplementary table 3. Baseline characteristics of patients in the multiregional single-cell study.**

| **Clinical information of seven primary liver cancer patients involved in this multiregional single-cell study** | |
| --- | --- |
| **Variable** | **Multiregional single-cell cohort (N=13)** |
| **Age — year** |  |
| **Median** | 72 |
| **Range** | 63–77 |
| **Sex — no. (%)** |  |
| **Female** | 3 (42.9) |
| **Male** | 4 (57.1) |
| **Etiology — no. (%)** |  |
| **HCV** | 1 (14.3) |
| **NAFLD** | 1 (14.3) |
| **NASH** | 3 (42.9) |
| **None** | 2 (28.6) |
| **Diagnosis — no. (%)** |  |
| **HCC** | 4 (57.1) |
| **iCCA** | 3 (42.9) |
| **Stage — no. (%)** |  |
| **I** | 3 (42.9) |
| **II** | 3 (42.9) |
| **IVA** | 1 (14.3) |
| **Vascular invasion — no. (%)** |  |
| **No** | 4 (57.1) |
| **Yes** | 3 (42.9) |
| **Tumor size — cm** |  |
| **Median** | 7.5 |
| **Range** | 3–24.5 |
| **CA19-9 — no. (%)** |  |
| **≤35 U/mL** | 4 (57.1) |
| **>35 U/mL** | 2 (28.6) |
| **Missing data** | 1 (14.3) |
| **Alpha-fetoprotein — no. (%)** |  |
| **Negative, ≤20 ng/mL** | 4 (57.1) |
| **Positive, >20 ng/mL** | 2 (28.6) |
| **Missing data** | 1 (14.3) |

**Supplementary table 4. Baseline characteristics of patients in the Spatial transcriptomics cohort.**

| **Clinical and Pathological Data of Each Patient** | | | | | | | |
| --- | --- | --- | --- | --- | --- | --- | --- |
| **Patient ID** | HCC-1 | HCC-2 | HCC-3 | HCC-4 | HCC-5 | cHC-1 | ICC-1 |
| **Sex** | Male | Female | Male | Male | Female | Female | Male |
| **Age** | 54 | 55 | 61 | 60 | 52 | 69 | 53 |
| **Etiology of liver disease** | HBV | HBV | non-HBV | HBV | HBV | HBV | non-HBV |
| **Cirrhosis** | Yes | No | No | No | Yes | Yes | No |
| **Preoperative ALT level(U/L)** | 47 | 49 | 31 | 17 | 29 | 206 | 27 |
| **Preoperative AST level(U/L)** | 53 | 40 | 23 | 23 | 19 | 250 | 20 |
| **Preoperative serum bilirubin(umol/L)** | 12.7 | 11.6 | 15.9 | 10.7 | 13.7 | 25.3 | 7.4 |
| **Preoperative serum ALB(g/L)** | 40.7 | 46.5 | 43 | 47.6 | 48.9 | 41.1 | 41.7 |
| **Hepatic encephalopathy** | 0 | 0 | 0 | 0 | 0 | 0 | 0 |
| **Ascites** | 0 | 0 | 0 | 0 | 0 | 0 | 0 |
| **Prothrombin time**（s） | 12.8 | 11.8 | 11.7 | 11.1 | 12.3 | 14.4 | 12 |
| **Child-Pugh grade** | A | A | A | A | A | A | A |
| **BCLC stage** | B | C | B | A | 0 | B | B |
| **Tumor size** | 6.5*6 cm | 4.3*4 cm | 8*7 cm | 3.8*3.5 cm | 1.5*1 cm | 5.0*4.2 cm | 7.6*6 cm |
| **Resection margin** | > 1 cm | >1 cm | > 1 cm | > 1 cm | > 1 cm | > 1 cm | > 1 cm |
| **MVI** | M1 | M2 | M2 | M0 | M0 | M0 | M0 |
| **Histology Type** | Macrotrabecular, grade III | Macrotrabecular, grade III | Macrotrabecular, grade III | Macrotrabecular, grade III | Macrotrabecular, grade III | Small bile duct type | - |
| **Capsule** | Complete | Incomplete | Complete | Complete | No | Incomplete | No |
| **Type of Resection** | R0 | R0 | R0 | R0 | R0 | R0 | R0 |
| **TNM Groups** | T2N0M0 | T4N0M0 | T2N0M0 | T1bN0M0 | T1aN0M0 | T1bN0M0 | T1bN1M0 |
| **Tumor Stage** | II | IIIb | II | Ib | Ia | Ib | IIIb |

**Abbreviations:** ALT，Alanine transaminase; AST, Aspartate aminotransferase; ALB, Albumin; BCLC stage, Barcelona clinic liver cancer stage; MVI, Microscopic vascular invasion; TNM stage, Tumor node metastasis stage

**Supplementary code**

install.packages("parallel")

library(parallel)

install.packages("doParallel")

library(doParallel)

numCores <- detectCores()

cl <- makeCluster(numCores)

registerDoParallel(cl)

result <- foreach(i=1:20, .combine='c') %dopar% {

Sys.sleep(1)

return(i^2)

}

print(result)

stopCluster(cl)

#define the color

library(ggsci)

cors <- pal_igv()(12)

cors <- c( "#82c785","#edeaa4","#cdaa9f","#794976","#e0bc58","#64abc0",

"#fab37f","#e98741","#8fc0dc","#967568","#f2d3ca","#eebd85",

"#bcacd3","#889b5d","#4e9592","#dbad5f","#64ae79","#ac5092")

cors <- c(

"#82c785","#edeaa4","#cdaa9f","#794976","#e0bc58","#64abc0",

"#fab37f","#e98741","#8fc0dc","#967568","#f2d3ca","#eebd85",

"#bcacd3","#889b5d","#4e9592","#dbad5f","#64ae79","#ac5092",

"#f6a4a4","#a4c8f6","#f6e1a4","#c8a4f6","#a4f6e1","#f6c8a4",

"#a4f6a4","#f6a4d8","#a4d8f6","#d8f6a4","#f6d8a4","#d8a4f6",

"#b0e0e6","#ffb347","#77dd77","#ff6961","#aec6cf","#fdfd96",

"#cfcfc4","#779ecb","#f49ac2","#966fd6"

)

cors_group <- c("#1f2d6f","#d5231d")

remove.packages(c("Seurat","SeuratObject"))

install.packages('Seurat')

packageVersion('Seurat')

setwd("D:\\Download\\1.diannaozidai\\1.zhuomian\\7777777\\1.HCC\\1.Singlecell\\2.fenxi")

library(Seurat)

library(SingleR)

library(tidyverse)

library(patchwork)

library(harmony)

library(future)

plan(sequential)

scRNA.counts=Read10X("D:\\Download\\1.diannaozidai\\1.zhuomian\\7777777\\1.HCC\\1.Singlecell\\2.fenxi\\HCC")

scRNA = CreateSeuratObject(scRNA.counts ,project="GSE189903",min.cells = 300, min.features = 1000)

saveRDS(scRNA,'GSE189903.rds')

scRNA[["percent.mt"]] <- PercentageFeatureSet(scRNA, pattern = "^MT-")

hb_genes <- c("HBA1", "HBA2", "HBB", "HBD", "HBE1", "HBG1", "HBG2", "HBM", "HBQ1", "HBZ")

scRNA[["percent.hb"]] <- PercentageFeatureSet(

scRNA,

features = hb_genes[hb_genes %in% rownames(scRNA)]

)

metadata<-FetchData(scRNA,"orig.ident")

metadata$Cell<-row.names(metadata)

write.csv(metadata,"metadata.csv")

patinets_metadata<-read.csv("",header = TRUE,row.names = 1)

row.names(patinets_metadata)<-patinets_metadata$Cell

scRNA<-AddMetaData(scRNA,metadata = patinets_metadata)

VlnPlot(scRNA,

features = c("nFeature_RNA", "nCount_RNA", "percent.mt", "percent.hb"),

pt.size = 0.01, ncol = 4) +

theme(axis.title.x=element_blank(), axis.text.x=element_blank(), axis.ticks.x=element_blank())

scRNA.1 <- subset(scRNA, subset =

nFeature_RNA > 400 &

nFeature_RNA < 3500 &

nCount_RNA < 15000 &

percent.mt < 10 &

percent.hb < 5)

scRNA.1 <- NormalizeData(scRNA.1, normalization.method = "LogNormalize", scale.factor = 10000)

scRNA.1 <- FindVariableFeatures(scRNA.1, selection.method = "vst", nfeatures = 2000)

scRNA.1 <- ScaleData(scRNA.1, features = VariableFeatures(scRNA.1))

scRNA.1 <- RunPCA(scRNA.1, features = VariableFeatures(scRNA.1))

scRNA.1 <- RunHarmony(scRNA.1, group.by.vars = "Sample")

DimPlot(scRNA.1, reduction = "harmony", group.by = "Sample")

ElbowPlot(scRNA.1,reduction = 'harmony')

scRNA.1 <- FindNeighbors(scRNA.1, dims = 1:5, reduction = "harmony")

scRNA.1 <- FindClusters(scRNA.1, resolution = 1)

scRNA.1 <- RunUMAP(scRNA.1, dims = 1:5, reduction = "harmony")

saveRDS(scRNA.1, "scRNA.harmony.umap.rds")

library(SingleR)

load("ref_Human_all.RData")

refdata <- ref_Human_all

testdata <- GetAssayData(scRNA.1, slot = "data")

clusters <- scRNA.1@meta.data$seurat_clusters

cellpred <- SingleR(

test = testdata,

ref = refdata,

labels = refdata$label.main,

method = "cluster",

clusters = clusters,

assay.type.test = "logcounts",

assay.type.ref = "logcounts"

)

plotScoreHeatmap(cellpred)

celltype <- data.frame(

ClusterID = rownames(cellpred),

celltype = cellpred$labels,

stringsAsFactors = FALSE

)

write.csv(celltype, "celltype_singleR.csv", row.names = FALSE)

scRNA.1@meta.data$celltype = "NA"

for(i in 1:nrow(celltype)){

scRNA.1@meta.data[which(scRNA.1@meta.data$seurat_clusters == celltype$ClusterID[i]),'celltype'] <- celltype$celltype[i]}

DimPlot(scRNA.1, group.by="celltype", label=T, label.size=5)

DimPlot(scRNA.1, group.by="group", label=T, label.size=5)

celltype<-read.csv('celltype_singleR.csv',header = T)

scRNA.1@meta.data$celltype = "NA"

for(i in 1:nrow(celltype)){

scRNA.1@meta.data[which(scRNA.1@meta.data$seurat_clusters == celltype$ClusterID[i]),'celltype'] <- celltype$celltype[i]}

DimPlot(scRNA.1, group.by="celltype", label=T, label.size=5)

saveRDS(scRNA.1,'.rds')

DotPlot(scRNA.1, features = c("CD320","CD68"))

DotPlot(scRNA.1, features = c("Egfl7","Cldn5","Cdh5","Ramp2","Ecscr","Pecam1","Cd200","Ltbp4"))

DotPlot(scRNA.1, features = c("Acta2","Col4a1","Col4a2","Gm13889","Higd1b","Myl9","Mylk","Rgs5"))

DotPlot(scRNA.1, features = c("S100a8"))

DotPlot(scRNA.1, features = c("Acta2"))

DotPlot(scRNA.1,

features = c("TMEM258"),

group.by = "group") +

scale_color_gradient(low = "white", high = "firebrick", name = "Avg. Expression") +

scale_size(range = c(2, 8), name = "Pct. Expressed") +

theme_minimal(base_size = 13) +

theme(

panel.border = element_rect(color = "black", fill = NA, size = 0.8),

axis.text.x = element_text(angle = 45, hjust = 1, size = 12, face = "bold"),

axis.text.y = element_text(size = 12, face = "bold"),

legend.position = "right",

legend.title = element_text(size = 11, face = "bold"),

legend.text = element_text(size = 10),

panel.grid.major = element_line(color = "grey90", size = 0.3),

panel.grid.minor = element_blank(),

axis.title = element_blank(),

plot.title = element_text(hjust = 0.5, face = "bold", size = 14)

) +

ggtitle("DotPlot of marker gene")

head(rownames(testdata))

head(rownames(refdata))

table(scRNA.1@meta.data$seurat_clusters)

Idents(scRNA.1)=scRNA.1$seurat_clusters

gene_marker <-c("CD19","MS4A1","CD79A",

"IGHG1","IGHA1","JCHAIN",

"CD3D","CD3E","CD3G",

"CD4","IL7R","FOXP3",

"CD8A","CD8B","CCL5",

"GNLY","FGFBP2","NCR1",

"ITGAX","CD14","CD68",

"PGC","PGA3","MUC5AC","EPCAM",

"TPSAB1","TPSB2","KIT",

"PECAM1","CLDN5","RAMP2",

"DCN","LUM","PDGFRA",

"RGS5","PDGFRB","ACTA2"

)

DotPlot(scRNA.1,

features = gene_marker,

group.by = "seurat_clusters") + coord_flip()

DotPlot(scRNA.1,

features = "EPCAM",

group.by = "seurat_clusters") + coord_flip()

celltype=c('T cells','T cells','T cells','T cells',"T cells",

'T cells','TANs','Myeloid cells','B cells','Glial',

'Glial','Glial','TANs','Myeloid cells','Glial',

'Hepatocyte','Hepatocyte','T cells','Glial',"Glial",

'T cells','T cells','T cells','T cells',"T cells",

'T cells','Hepatocyte','Myeloid cells','B cells','Glial',

'Glial','Glial','TANs','Myeloid cells','Glial',

'1Hepatocyte','1Hepatocyte')

names(celltype) <- levels(scRNA.1)

scRNA.1<- RenameIdents(scRNA.1, celltype)

scRNA.1@meta.data$celltype <- Idents(scRNA.1)

cell = c('T/NK cells',"B cells",'Endothelial cells','Fibroblasts','Glial','Hepatocytes',"Macrophages","Monocytes","Neutrophils")

scRNA.1$celltype <- factor(scRNA.1$celltype,levels = cell)

Idents(scRNA.1) <- scRNA.1$celltype

scRNA.1 <- subset(scRNA.1, celltype != 'Glial')

scRNA.1@meta.data$celltype <- Idents(scRNA.1)

table(scRNA.1@meta.data$celltype)

scRNA.1@meta.data[1:5,]

scRNA$Group <- factor(scRNA$Group,levels = c('Tumor','Normal'))

scRNA$sample <- scRNA$id

saveRDS(scRNA.1,'scRNA_zhushi.rds')

scRNA = readRDS('scRNA_GSE206785.rds')

packageVersion("SeuratObject")

install.packages('Seurat')

remove.packages(c("Seurat","SeuratObject"))

metadata<-FetchData(scRNA.1,"orig.ident")

metadata$Cell<-row.names(metadata)

patinets_metadata<-data.table::fread("cli.csv",header = TRUE)

metadata<-left_join(x=metadata,y=patinets_metadata,by="orig.ident")

patinets_metadata$orig.ident <- as.factor(patinets_metadata$orig.ident)

row.names(metadata)<-metadata$Cell

scRNA.1<-AddMetaData(scRNA.1,metadata = metadata)

library(scRNAtoolVis)

pdf(file=paste0('--15-5--.pdf'),width = 15,height = 5)

clusterCornerAxes(object = scRNA.1, reduction = 'umap',

clusterCol = "Sample",

pSize = 0.3,

noSplit = F, groupFacet = 'group',

cellLabel = F) +

scale_color_manual(values = cors)

dev.off()

library(plot1cell)

library(Seurat)

library(tidyverse)

library(stringr)

library(RColorBrewer)

library(plot1cell)

circ_data <- prepare_circlize_data(scRNA, scale = 0.8)

pdf(file ='scRNA_celltype_circle_umap1.pdf', width = 5, height = 5)

plot_circlize(circ_data,do.label = T, pt.size = 0.05, col.use = cors[1:8], bg.color = 'white', kde2d.n = 200, repel = T, label.cex = 0.6)

add_track(circ_data, group = "group", colors = cors_group, track_num = 2)

dev.off()

install.packages('remotes')

remotes::install_github(repo = 'genecell/COSGR')

library(COSG)

marker_cosg <- cosg(

scRNA,

groups='all',

assay='RNA',

slot='data',

mu=1,

remove_lowly_expressed=TRUE,

expressed_pct=0.1,

n_genes_user=100

)

head(marker_cosg$names,3)

head(marker_cosg$scores,3)

all_markers <- marker_cosg$names

write.csv(all_markers,'all_celltype_markers.csv')

marker<-c()

for (group in colnames(marker_cosg$names)){

top_i<-marker_cosg$names[group][1,1]

marker<-c(marker,top_i)

}

features = gene_marker

features=c("scRNA")

library(tidydr)

library(ggrepel)

pdf(file=paste0('scRNA_celltype_FeaturePlot2.pdf'),width = 10,height = 6)

FeaturePlot(scRNA.1,features = features, ncol = 5,

cols = c('#333366',"#6666FF",'#CC3333','#FFCC33')) &

theme_bw() &

theme_void()

dev.off()

features=c("Csf1r","Irf8")

pdf(file=paste0('scRNA_celltype_vlnplot.pdf'),width = 6,height = 9)

VlnPlot(scRNA, features = features,

stack = TRUE,

sort = F,

cols = cors,

split.by = "celltype" ,

flip = TRUE,

split.plot = TRUE) +

theme(axis.text.x = element_text(size = 12,angle = 45,hjust = 1,vjust = 1),

axis.text.y = element_blank(),axis.ticks.y = element_blank(),

panel.grid.major = element_blank(),panel.grid.minor = element_blank(),

legend.position = "none") + labs(x=NULL,y=NULL)

dev.off()

pdf(file=paste0('scRNA_celltype_dotplot.pdf'),width = 12,height = 5)

DotPlot(scRNA.1, features = features, assay='RNA') +

theme(panel.grid = element_blank(),

axis.text.x=element_text(angle = 45, hjust = 1,vjust = 1))+

labs(x=NULL,y=NULL) +

guides(size = guide_legend("Percent Expression") )+

scale_color_gradientn(colours = c('#3B4992FF',"#8491B4FF",'#F39B7FFF','#BB0021FF'))

dev.off()

jjDotPlot(object = scRNA.1,gene = features,

id = 'celltype',

ytree = F,

dot.col = c('#3C5488FF','white','#BB0021FF'),

rescale.min = 0,rescale.max = 2,midpoint = 0) +

theme(panel.grid = element_blank(),

axis.text.x=element_text(angle = 45, hjust =1,vjust=1))

save(scRNA.1,file = ".rdata")

library(reshape2)

library(ggplot2)

prop_df <- table(scRNA.1$celltype,scRNA.1$Sample) %>% melt()

colnames(prop_df) <- c("celltype","Sample","Number")

prop_df$celltype <- factor(prop_df$celltype)

prop_df$Proportion <- ave(prop_df$Number, prop_df$Sample,

FUN = function(x) x/sum(x))

prop_df <- arrange(prop_df,celltype)

write.csv(prop_df,"Sample.csv",row.names = F)

ggplot(data = prop_df, aes(x = Number, y =Sample, fill = celltype)) +

geom_bar(stat = "identity", width=0.8,position="fill")+

scale_fill_manual(values=cors) +

coord_flip()+

theme_bw()+

theme(panel.grid =element_blank()) +

labs(x="Proportion",y="Group")+

theme(axis.text.y = element_text(size=12, colour = "black"),

axis.text.x = element_text(size=12, colour = "black"),

legend.title=element_blank(),

legend.text=element_text(size=12),

axis.text.x.bottom = element_text(hjust = 1, vjust = 1, angle = 45))

ggsave("Sample.pdf",width = 12,height = 5)

ggplot(prop_df, aes(x = group, y = Proportion, fill = group)) +

geom_col(position=position_dodge(0.8), width = 0.8)+

scale_fill_manual(values=c("#1f2d6f","#d5231d")) +

theme_bw()+

theme(panel.grid =element_blank()) +

labs(x="",y="Ratio")+

theme(axis.text.y = element_text(size=10, colour = "black"))+

theme(axis.text.x = element_text(size=10, colour = "black"))+

theme(axis.text.x.bottom = element_text(hjust = 1, vjust = 1, angle = 45))

Cellratio <- prop.table(table(Idents(scRNA), scRNA$sample), margin = 2)

Cellratio <- data.frame(Cellratio)

colnames(Cellratio) <- c('celltype','Sample','Freq')

Cellratio$group <- ifelse(grepl('SS',Cellratio$Sample),"Normal", "Tumor")

Cellratio$group <- factor(Cellratio$group,levels = c("Normal", "Tumor"))

my_comparisons <- list(c("Normal", "Tumor"))

pdf(file="scRNA_sample_proportion_boxplot.pdf", width=9, height=4.5)

ggboxplot(Cellratio, x="group", y="Freq",

fill="group",color = "black",

width = 0.6,

palette = c('#3C5488FF','#BB0021FF'),

bxp.errorbar=T,

bxp.errorbar.width=0.3,

size=0.5,

outlier.shape=NA,

legend = "right") +

geom_jitter(size=1) +

labs(title = "",y="Proportion") +

theme(axis.text.x=element_blank(),axis.ticks.x=element_blank(),axis.title.x=element_blank(),

strip.background = element_blank(),

strip.text = element_text(size = 10)) +

theme(panel.border = element_rect(colour = "black", fill=NA)) +

facet_wrap(~celltype, ncol=5, scales = "free_y") +

stat_compare_means(comparisons = my_comparisons, method = "t.test",

label='p.signif',hide.ns = T)

dev.off()

remove.packages(c("Seurat","SeuratObject"))

install.packages('Seurat', repos = c('https://satijalab.r-universe.dev'))

packageVersion('Seurat')

packageVersion("SeuratObject")

scRNA=scRNA.1

scRNA$celltype.group <- paste(scRNA$group, scRNA$celltype, sep = "_")

Idents(scRNA) <- "celltype.group"

table(scRNA$celltype.group)

av <- AverageExpression(scRNA,

group.by ="celltype.group",

assays ="RNA")[[1]]

head(av)

cg=names(tail(sort(apply(av,1,sd)),1000))

exp_cor <- cor(av[cg,],method='spearman')

library(corrplot)

range(exp_cor)

pdf(file=paste0('scRNA_celltype_correlation_heatmap.pdf'),width = 10,height = 10)

corrplot(exp_cor,method = "circle",

col.lim = c(0, 1),is.corr = F,

type="upper",

tl.pos="lt", tl.cex=1, tl.col="black",

insig="label_sig",sig.level = c(.001, .01, .05),

pch.cex = 0.8,pch.col = "black",col = colorRampPalette(c('#3B4992FF', "white",'#DC0000FF'))(50))+

theme(axis.text.x=element_text(angle = 45, hjust=1,vjust=1))

corrplot(corr =exp_cor,method = "number",

type="lower",add = TRUE,

tl.pos="n",cl.pos = "n",diag = FALSE,

col = "black",number.cex = 0.7)

dev.off()

all_markers <- FindAllMarkers(object = scRNA,

only.pos = F,

min.pct = 0.25,logfc.threshold = 0.5)

write.csv(all_markers,file = "all_markers.csv")

top5_markers <- all_markers %>% group_by(cluster) %>% top_n(5, avg_log2FC)

top5_markers <- top5_markers[!duplicated(top5_markers$gene),]

genes <- unique(top5_markers$gene)

genes <- gene_marker

aver_dt <- AverageExpression(scRNA,

features = genes,

group.by = 'celltype',

slot = 'data')

aver_dt <- as.data.frame(aver_dt$RNA)

library(scRNAtoolVis)

pdf(file="3.2.scRNA_marker_multivolcano.pdf", width=10, height=8)

jjVolcano(diffData = all_markers,

log2FC.cutoff = 0.5, topGeneN = 5,

aesCol = c('#4DBBD5FF','#E64B35FF'))

dev.off()

jjVolcano(diffData = all_markers,

log2FC.cutoff = 0.5, topGeneN = 5, sisze = 3,

aesCol = c('#4DBBD5FF','#E64B35FF'),

tile.col = corrplot::COL2('RdBu', 15)[4:12],

fontface = 'italic', polar = T)

library(ComplexHeatmap)

library(cols4all)

mycol <- colorRampPalette(c("#4DBBD5FF", "white", "#E64B35FF"))(50)

celltype_col <- c4a('10', 10)

gene_anno <- data.frame(gene_anno = top5_markers$cluster,

row.names = top5_markers$gene)

cell_anno <- data.frame(cell_anno = colnames(aver_dt),

row.names = colnames(aver_dt))

names(celltype_col) <- cell_anno$cell_anno

anno_col <- list(cell_anno = celltype_col,gene_anno = celltype_col)

pdf(file="3.3.scRNA_top5marker_heatmap.pdf", width=6, height=9)

pheatmap(as.matrix(aver_dt),

scale = "row",

cluster_rows = FALSE,

cluster_cols = FALSE,

color = mycol,

border_color = 'white')

dev.off()

library(scRNAtoolVis)

AverageHeatmap(object = scRNA,

markerGene = gene_marker,

clusterAnnoName = F,

htCol = c("#4DBBD5FF", "white", "#DC0000FF"),

annoCol = TRUE, myanCol = cors[1:10])

pdf(file=paste0('scRNA_KRT_DEG_heatmap.pdf'),width = 5,height = 4)

DoHeatmap(scRNA, top10_markers$gene,

group.by = 'group', group.colors = cors) +

scale_fill_gradientn(colors = c("#3C5488FF", "white", "#DC0000FF"))

dev.off()

names(scRNA@meta.data)

unique(scRNA$group)

Idents(scRNA) <- "group"

CELLDEG <- FindMarkers(scRNA,ident.1 = 'Normal',ident.2 = 'Tumor',

verbose = FALSE, test.use = 'wilcox',

min.pct = 0.25,logfc.threshold = 0.5)

write.csv(CELLDEG, 'all_cell_DEG.csv')

CELLDEG <- CELLDEG %>% arrange(avg_log2FC)

top10_DEG <- rbind(head(CELLDEG,10),tail(CELLDEG,10))

scRNA$celltype.group <- paste(scRNA$celltype, scRNA$group, sep = "_")

Idents(scRNA) <- "celltype.group"

CELLDEG <- FindMarkers(scRNA,ident.1 = 'Normal_B cells',ident.2 = 'Tumor_B cells',

verbose = FALSE, test.use = 'wilcox',min.pct = 0.1)

cellfordeg <- levels(scRNA$celltype)

for(i in 1:length(cellfordeg)){

CELLDEG <- FindMarkers(scRNA, ident.1 = paste0(cellfordeg[i],'_Cums5m-Skin'), ident.2 = paste0(cellfordeg[i],'_Con-Skin'),

only.pos = T, verbose = F)

CELLDEG$cluster <- cellfordeg[i]

write.csv(CELLDEG,paste0(cellfordeg[i],".csv"))

}

dir <- list.files(pattern = ".csv")

all_DEG <- lapply(dir, read.csv) %>% bind_rows()

colnames(all_DEG)[1] <- 'gene'

top5_DEG <- all_DEG %>% subset(p_val_adj < 0.05) %>%

group_by(cluster) %>% top_n(5, avg_log2FC)

top5_DEG <- top5_DEG[!duplicated(top5_DEG$gene),]

library(scRNAtoolVis)

pdf(file="scRNA_DEG_multivolcano.pdf", width=14, height=7)

jjVolcano(diffData = all_DEG,

log2FC.cutoff = 0.5, topGeneN = 5,

aesCol = c('#3B4992FF','#BB0021FF')) +

scale_color_manual(values = cors) + scale_fill_manual(values = cors)

dev.off()

library(scRNAtoolVis)

Idents(scRNA) <- "celltype"

AverageHeatmap(object = scRNA,

markerGene = top10_DEG$gene,

clusterAnnoName = F,

row_title = "Cell-specific DEGs",

htCol = c("#3B4992FF", "white", "#DC0000FF"),

annoCol = TRUE, myanCol = cors[1:7])

library(clusterProfiler)

geneSet <- read.gmt("KEGG_JAK_STAT_SIGNALING_PATHWAY.v2023.2.Hs.gmt")

geneList <- all_markers$avg_log2FC

names(geneList) <- rownames(all_markers)

geneList <- sort(geneList, decreasing = T)

GSEA_enrichment <- GSEA(geneList,

TERM2GENE = geneSet,

pvalueCutoff = 0.05,

minGSSize = 20,

maxGSSize = 1000,

eps = 0,

pAdjustMethod = "BH")

result <- data.frame(GSEA_enrichment)

dim(GSEA_enrichment@result)

library(enrichplot)

gseaplot2(GSEA_enrichment, 'KEGG_JAK_STAT_SIGNALING_PATHWAY', color = "red3", pvalue_table = T)

genelist <- bitr(DEG_DESeq2$Gene_Symbol, fromType="SYMBOL",

toType="ENTREZID", OrgDb='org.Hs.eg.db')

ego1 <- enrichGO(gene = genelist$ENTREZID,

OrgDb = org.Hs.eg.db,

ont = "BP",

pAdjustMethod = "BH",

minGSSize = 1,

pvalueCutoff =0.05, qvalueCutoff =0.2,

readable = TRUE)

ego1_res <- ego1@result

ego1_res$Group <- 'M vs H'

ego1_res$LogP <- -log(ego1_res$p.adjust)

ego1_res = ego1_res %>%

dplyr::filter(grepl('pathway|signal|T cell|immune|oxidative|antigen|mitochondrion', Description)) %>%

dplyr::arrange(dplyr::desc(LogP),dplyr::desc(Description)) %>%

mutate(Description =forcats:: fct_inorder(Description))

library(clusterProfiler)

head(DEG_DESeq2)

geneSet = msigdbr(species = "Homo sapiens") %>% dplyr::select(gs_name,gene_symbol)

geneSet = subset(geneSet, gs_name %in% c("KEGG_JAK_STAT_SIGNALING_PATHWAY",

'KEGG_MAPK_SIGNALING_PATHWAY',

"KEGG_HEDGEHOG_SIGNALING_PATHWAY",

'KEGG_NOTCH_SIGNALING_PATHWAY',

'KEGG_WNT_SIGNALING_PATHWAY',

'KEGG_TGF_BETA_SIGNALING_PATHWAY',

'KEGG_OXIDATIVE_PHOSPHORYLATION',

'KEGG_ANTIGEN_PROCESSING_AND_PRESENTATION',

'REACTOME_INTERFERON_SIGNALING',

'REACTOME_STING_MEDIATED_INDUCTION_OF_HOST_IMMUNE_RESPONSES',

'BIOCARTA_NOS1_PATHWAY',

'GOBP_RESPONSE_TO_OXIDATIVE_STRESS',

'REACTOME_CELLULAR_SENESCENCE',

'GOBP_AUTOPHAGY_OF_MITOCHONDRION'))

geneList <- DEG_DESeq2$log2FoldChange

names(geneList) <- DEG_DESeq2$Gene_Symbol

geneList <- sort(geneList, decreasing = T)

GSEA_enrichment <- GSEA(geneList,

TERM2GENE = geneSet,

pvalueCutoff = 1,

minGSSize = 20,

maxGSSize = 1000,

eps = 0,

pAdjustMethod = "BH")

result <- data.frame(GSEA_enrichment)

library(enrichplot)

pdf('mela_GSEA_plot_C7.pdf', width = 6, height = 5)

gseaplot2(GSEA_enrichment,'REACTOME_INTERFERON_SIGNALING', color = "red3", pvalue_table = T)

dev.off()

library(ggplot2)

pdf('mela_GSEA_dotplot_C7.pdf', width = 12, height = 10)

dotplot(GSEA_enrichment, showCategory = 10, split = ".sign") + facet_grid(~.sign) +

theme(plot.title = element_text(size = 10, color = "black", hjust = 0.5),

axis.title = element_text(size = 10,color = "black"),

axis.text = element_text(size = 10,color = "black"),

axis.text.x = element_text(angle = 0, hjust = 1 ),

legend.position = "right",

legend.text = element_text(size = 10),

legend.title = element_text(size = 10))

dev.off()

library(GSVA)

Idents(scRNA.1) <- "celltype"

B <- subset(scRNA_harmony, idents = c("Hepatocyte"))

genes <- unique(rownames(scRNA@assays$RNA@counts))

aver_dt <- AverageExpression(scRNA,

features = genes,

group.by = 'celltype',

slot = 'data')

aver_dt <- as.data.frame(aver_dt$RNA)

aver_dt <- aver_dt[rowSums(aver_dt)>0,]

geneSet = msigdbr(species = "Homo sapiens")

geneSet %>% dplyr::distinct(gs_cat, gs_subcat) %>% dplyr::arrange(gs_cat, gs_subcat)

geneSet_name = c('HALLMARK_EPITHELIAL_MESENCHYMAL_TRANSITION',

"KEGG_MTOR_SIGNALING_PATHWAY",

"KEGG_JAK_STAT_SIGNALING_PATHWAY",

'KEGG_MAPK_SIGNALING_PATHWAY',

"KEGG_HEDGEHOG_SIGNALING_PATHWAY",

'KEGG_NOTCH_SIGNALING_PATHWAY',

'KEGG_WNT_SIGNALING_PATHWAY',

'KEGG_TGF_BETA_SIGNALING_PATHWAY',

'KEGG_OXIDATIVE_PHOSPHORYLATION',

'KEGG_P53_SIGNALING_PATHWAY',

'KEGG_CHEMOKINE_SIGNALING_PATHWAY',

'REACTOME_STING_MEDIATED_INDUCTION_OF_HOST_IMMUNE_RESPONSES',

'REACTOME_CYTOKINE_SIGNALING_IN_IMMUNE_SYSTEM',

'REACTOME_CELLULAR_SENESCENCE',

'REACTOME_SIGNALING_BY_VEGF',

'BIOCARTA_IFNG_PATHWAY',

'GOBP_RESPONSE_TO_OXIDATIVE_STRESS',

'GOBP_AUTOPHAGY_OF_MITOCHONDRION',

'GOBP_RESPONSE_TO_TYPE_I_INTERFERON',

'BIOCARTA_CYTOKINE_PATHWAY')

my_geneSet = subset(geneSet, gs_name %in% geneSet_name)

my_geneSet = my_geneSet %>% split(x = .$gene_symbol, f = .$gs_name)

exp_gsva <- gsva(as.matrix(aver_dt), my_geneSet, min.sz > 1)

BiocManager::install("GSEABase")

library(GSEABase)

geneSets=getGmt("c2.cp.kegg_legacy.v2024.1.Hs.symbols-.gmt", geneIdType=SymbolIdentifier())

params <- gsvaParam(as.matrix(aver_dt), geneSets,

minSize = 1, maxSize = Inf,

kcdf = "Gaussian", tau = 1,

maxDiff = TRUE, absRanking = FALSE)

exp_gsva <- gsva(params, verbose = TRUE, BPPARAM = BiocParallel::SerialParam(progressbar = TRUE))

rownames(exp_gsva)

exp_gsva <- exp_gsva[c(5,2,1,18,3:4,6:17,19:20),]

rownames(exp_gsva) <- c('Type I IFN pathway',

'IFN-γ pathway',

'Cytokine network',

'Immune system cytokine signaling',

'Autophagy of mitochondrion',

'Response to oxidative stress',

'Epithelial-Mesenchymal Transition',

'Chemokine signaling',

"HEDGEHOG signaling",

"JAK STAT signaling",

'MAPK signaling',

'mTOR signaling',

'NOTCH signaling',

'Oxidative Phosphorylation',

'P53 signaling',

'TGF BETA signaling',

'WNT signaling',

'Cellular senescence ',

'VEGF signaling',

'STING signaling')

library(pheatmap)

annotation_col <- data.frame(celltype = levels(scRNA$celltype))

rownames(annotation_col) <- colnames(exp_gsva)

ann_colors <- cors[1:10]

names(ann_colors) <- levels(scRNA$celltype)

ann_colors = list(celltype = ann_colors)

cairo_pdf('scRNA_celltype_GSVA_interest_heatmap.pdf', width = 6.5, height = 5.5)

pheatmap::pheatmap(exp_gsva,

scale = "row",

show_colnames = T,

cluster_rows = F, cluster_cols = F,

border_color = "black",

color = colorRampPalette(c("#3C5488FF","white","#d5231d"))(50),

annotation_colors = ann_colors,

annotation_col = annotation_col)

dev.off()

library(pheatmap)

annotation_col = data.frame(group = rep(c('Healthy','Melanoma'),10),

celltype = rep(levels(scRNA$celltype),each=2))

rownames(annotation_col) <- colnames(exp_gsva)

ann_colors <- cors[1:10]

names(ann_colors) <- levels(scRNA$celltype)

ann_colors = list(group = c('Healthy'='#3C5488FF','Melanoma'="#d5231d"),

celltype = ann_colors)

cairo_pdf('scRNA_celltype_group_GSVA_interest.pdf', width = 8.5, height = 4)

pheatmap::pheatmap(exp_gsva,

scale = "row",

show_colnames = F,

cluster_rows = F, cluster_cols = F,

border_color = 'white',

gaps_col = c(2,4,6,8,10,12,14,16,18),

color = colorRampPalette(c("#2166AC","white","#B2182B"))(50),

annotation_colors = ann_colors,

annotation_col = annotation_col)

dev.off()

my_geneSet <- list('Nitrogen metabolism' = my_geneSet$`Nitrogen metabolism`)

cells_AUC <- AUCell_run(scRNA@assays$RNA@data, my_geneSet)

my_geneSet_name <- 'Nitrogen metabolism'

AUCell_auc <- as.numeric(getAUC(cells_AUC)[my_geneSet_name, ])

scRNA$AUCell <- AUCell_auc

pdf(file='scRNA_celltype_Nitrogen_vlnplot.pdf',width = 6,height = 3.5)

VlnPlot(scRNA, pt.size = 0, cols = cors,

features = "AUCell")+

geom_boxplot(width = 0.1, outlier.shape = NA, fill = "white")+

labs(title = "Nitrogen metabolism", x="",y="")+

theme(legend.position = 'None')

dev.off()

my_comparisons = list(c("Normal", "GC"))

pdf(file='scRNA_celltype_group_Nitrogen_boxplot.pdf',width = 7,height = 3.5)

ggboxplot(scRNA@meta.data, x="celltype", y="AUCell",

fill="group",color = "black",

width = 0.6,

palette = c('#3C5488FF','#BB0021FF'),

bxp.errorbar=T,

bxp.errorbar.width=0.3,

size=0.5,

outlier.shape=NA,

legend = "right") +

theme(axis.text.x=element_text(size = 8, angle = 45, hjust = 1,vjust = 1),axis.title.x = element_blank(),

strip.background = element_blank(),

strip.text = element_text(size = 10)) +

labs(title = "", x="",y="Nitrogen metaolism") +

theme(panel.border = element_rect(colour = "black", fill=NA)) +

stat_compare_means(aes(group=group),

symnum.args=list(cutpoints=c(0, 0.001, 0.01, 0.05, 1),symbols=c("***", "**", "*", "ns")),label="p.signif")

dev.off()

Idents(scRNA.1) <- "celltype"

library(AUCell)

library(clusterProfiler)

cells_rankings <- AUCell_buildRankings(scRNA.1@assays$RNA@data)

Hallmarker <- read.gmt("c2.cp.kegg_legacy.v2024.1.Hs.symbols-.gmt")

geneSets <- lapply(unique(Hallmarker$term), function(x){print(x);Hallmarker$gene[Hallmarker$term == x]})

names(geneSets) <- unique(Hallmarker$term)

cells_AUC <- AUCell_calcAUC(geneSets, cells_rankings, aucMaxRank=nrow(cells_rankings)*0.1)

geneSet <- "Aminoacyl-tRNA biosynthesis"

aucs <- as.numeric(getAUC(cells_AUC)[geneSet, ])

scRNA.1$AUC <- aucs

library(ggraph)

p<-ggplot(data.frame(scRNA.1@meta.data, scRNA.1@reductions$umap@cell.embeddings), aes(UMAP_1, UMAP_2, color=AUC)

) + geom_point( size=1.5

) + scale_color_viridis(option="A") + theme_light(base_size = 15)+labs(title = "Aminoacyl-tRNA biosynthesis")+

theme(panel.border = element_rect(fill=NA,color="black", size=1, linetype="solid"))+

theme(plot.title = element_text(hjust = 0.5))

metadata1<-FetchData(scRNA.1,c("orig.ident","AUC","orig.ident","Group","celltype","group"))

write.csv(metadata1,".csv")

my_comparisons = list(c("T1", "T2","Core"))

pdf(file='.pdf',width = 7.5,height = 4.5)

ggboxplot(scRNA.1@meta.data, x="celltype", y="AUC",

fill="rigon",color = "black",

width = 0.6,

palette = c('#3C5488FF',"#f0b87f",'#BB0021FF'),

bxp.errorbar=T,

bxp.errorbar.width=0.3,

size=0.5,

outlier.shape=NA,

legend = "right") +

theme(axis.text.x=element_text(size = 8, angle = 45, hjust = 1,vjust = 1),axis.title.x = element_blank(),

strip.background = element_blank(),

strip.text = element_text(size = 10)) +

labs(title = "", x="",y="Aminoacyl-tRNA biosynthesis") +

theme(panel.border = element_rect(colour = "black", fill=NA)) +

stat_compare_means(aes(group=rigon),

symnum.args=list(cutpoints=c(0, 0.001, 0.01, 0.05, 1),symbols=c("***", "**", "*", "ns")),label="p.signif")

dev.off()

my_comparisons = list(c("Adjacent", "Tumor"))

pdf(file='.pdf',width = 7.5,height = 4.5)

ggboxplot(scRNA.1@meta.data, x="celltype", y="AUC",

fill="group",color = "black",

width = 0.6,

palette = c('#3C5488FF','#BB0021FF'),

bxp.errorbar=T,

bxp.errorbar.width=0.3,

size=0.5,

outlier.shape=NA,

legend = "right") +

theme(axis.text.x=element_text(size = 8, angle = 45, hjust = 1,vjust = 1),axis.title.x = element_blank(),

strip.background = element_blank(),

strip.text = element_text(size = 10)) +

labs(title = "", x="",y="Aminoacyl-tRNA biosynthesis") +

theme(panel.border = element_rect(colour = "black", fill=NA)) +

stat_compare_means(aes(group=group),

symnum.args=list(cutpoints=c(0, 0.001, 0.01, 0.05, 1),symbols=c("***", "**", "*", "ns")),label="p.signif")

dev.off()

library(ggplot2)

library(ggpubr)

metadata<-FetchData(scRNA.1,c("AUC","orig.ident","Cell","ID","Sample","id","rigon","Group","celltype","rigon"))

write.csv(metadata,".csv")

scRNA.1$Nitro_group <- ifelse(scRNA.1$AUC>median(scRNA.1$AUC), 'High', 'Low')

Idents(scRNA.1) <- "Nitro_group"

CELLDEG <- FindMarkers(scRNA.1,ident.1 = 'High',ident.2 = 'Low',

verbose = FALSE, test.use = 'wilcox',

min.pct = 0.1,logfc.threshold = 0.1)

DEGs <- subset(CELLDEG, p_val < 0.05 & abs(avg_log2FC) > 0.25)

write.csv(DEGs,".csv")

exp <- scRNA.1@assays$RNA@data[rownames(DEGs),] %>% t() %>% data.frame()

Nitro_score <- data.frame(Nitro_score = scRNA.1$AUC)

identical(rownames(exp),rownames(Nitro_score))

cor_matrix <- cor(as.matrix(exp), as.matrix(Nitro_score),

use = "pairwise.complete.obs", method = "spearman") %>% data.frame()

cor_matrix <- cor_matrix %>% data.frame() %>%

dplyr::filter(abs(Nitro_score) > 0.1)

NRGs <- rownames(cor_matrix)

NRGs

DEGs_NRGs <- DEGs %>% dplyr::filter(rownames(DEGs) %in% NRGs)

save(DEGs, NRGs, DEGs_NRGs, cor_matrix, file = 'NRG.rda')

write.csv(NRGs,".csv")

write.csv(NRGs,".csv")

library(scCustomize)

FeaturePlot_scCustom(seurat_object = B, features = c("IARS2","EPCAM"),

split.by = "group",num_columns = 1)

FeaturePlot(B, features = c("HLA-DQB1"), cols = c("lightblue", "white", "darkred"), split.by = "Group2")

C$A<-row.names(C)

library(GSVA)

Idents(scRNA.1) <- "celltype"

B <- subset(scRNA.1, idents = c("Hepatocyte"))

library(AUCell)

library(clusterProfiler)

cells_rankings <- AUCell_buildRankings(B@assays$RNA@data)

Hallmarker <- read.gmt("c2.cp.kegg_legacy.v2024.1.Hs.symbols-.gmt")

geneSets <- lapply(unique(Hallmarker$term), function(x){print(x);Hallmarker$gene[Hallmarker$term == x]})

names(geneSets) <- unique(Hallmarker$term)

cells_AUC <- AUCell_calcAUC(geneSets, cells_rankings, aucMaxRank=nrow(cells_rankings)*0.1)

geneSet <- "Aminoacyl-tRNA biosynthesis"

aucs <- as.numeric(getAUC(cells_AUC)[geneSet, ])

B$AUC <- aucs

library(ggraph)

p<-ggplot(data.frame(B@meta.data, B@reductions$umap@cell.embeddings), aes(UMAP_1, UMAP_2, color=AUC)

) + geom_point( size=1.5

) + scale_color_viridis(option="A") + theme_light(base_size = 15)+labs(title = "Aminoacyl-tRNA biosynthesis")+

theme(panel.border = element_rect(fill=NA,color="black", size=1, linetype="solid"))+

theme(plot.title = element_text(hjust = 0.5))

metadata1<-FetchData(B,c("orig.ident","AUC","orig.ident","Group","celltype","group"))

write.csv(metadata1,".csv")

my_comparisons = list(c("T1", "T2","T3","T4"))

pdf(file='.pdf',width = 7.5,height = 4.5)

ggboxplot(B@meta.data, x="celltype", y="AUC",

fill="orig.ident",color = "black",

width = 0.6,

palette = c('#3C5488FF',"#f0b87f",'#BB0021FF',"red"),

bxp.errorbar=T,

bxp.errorbar.width=0.3,

size=0.5,

outlier.shape=NA,

legend = "right") +

theme(axis.text.x=element_text(size = 8, angle = 45, hjust = 1,vjust = 1),axis.title.x = element_blank(),

strip.background = element_blank(),

strip.text = element_text(size = 10)) +

labs(title = "", x="",y="Aminoacyl-tRNA biosynthesis") +

theme(panel.border = element_rect(colour = "black", fill=NA)) +

stat_compare_means(aes(group=orig.ident),

symnum.args=list(cutpoints=c(0, 0.001, 0.01, 0.05, 1),symbols=c("***", "**", "*", "ns")),label="p.signif")

dev.off()

my_comparisons = list(c("Adjacent", "Tumor"))

pdf(file='.pdf',width = 7.5,height = 4.5)

ggboxplot(B@meta.data, x="celltype", y="AUC",

fill="group",color = "black",

width = 0.6,

palette = c('#3C5488FF','#BB0021FF'),

bxp.errorbar=T,

bxp.errorbar.width=0.3,

size=0.5,

outlier.shape=NA,

legend = "right") +

theme(axis.text.x=element_text(size = 8, angle = 45, hjust = 1,vjust = 1),axis.title.x = element_blank(),

strip.background = element_blank(),

strip.text = element_text(size = 10)) +

labs(title = "", x="",y="Aminoacyl-tRNA biosynthesis") +

theme(panel.border = element_rect(colour = "black", fill=NA)) +

stat_compare_means(aes(group=group),

symnum.args=list(cutpoints=c(0, 0.001, 0.01, 0.05, 1),symbols=c("***", "**", "*", "ns")),label="p.signif")

dev.off()

library(ggplot2)

library(ggpubr)

metadata<-FetchData(scRNA.1,c("AUC","orig.ident","Cell","ID","Sample","id","rigon","group","celltype","rigon"))

write.csv(metadata,".csv")

B$Nitro_group <- ifelse(B$AUC>median(B$AUC), 'High', 'Low')

Idents(B) <- "Nitro_group"

CELLDEG <- FindMarkers(B,ident.1 = 'High',ident.2 = 'Low',

verbose = FALSE, test.use = 'wilcox',

min.pct = 0.1,logfc.threshold = 0.1)

DEGs <- subset(CELLDEG, p_val < 0.05 & abs(avg_log2FC) > 0.25)

DEGs<-read.csv(".csv",row.names = 1,header = T,check.names = F)

write.csv(DEGs,".csv")

exp <- B@assays$RNA@data[rownames(DEGs),] %>% t() %>% data.frame()

Nitro_score <- data.frame(Nitro_score = B$AUC)

identical(rownames(exp),rownames(Nitro_score))

cor_matrix <- cor(as.matrix(exp), as.matrix(Nitro_score),

use = "pairwise.complete.obs", method = "spearman") %>% data.frame()

cor_matrix <- cor_matrix %>% data.frame() %>%

dplyr::filter(abs(Nitro_score) > 0.1)

NRGs <- rownames(cor_matrix)

NRGs

DEGs_NRGs <- DEGs %>% dplyr::filter(rownames(DEGs) %in% NRGs)

save(DEGs, NRGs, DEGs_NRGs, cor_matrix, file = 'NRG.rda')

write.csv(NRGs,".csv")

write.csv(NRGs,".csv")

library(scCustomize)

FeaturePlot_scCustom(seurat_object = B, features = c("IARS2","EPCAM"),

split.by = "group",num_columns = 1)

FeaturePlot(B, features = c("HLA-DQB1"), cols = c("lightblue", "white", "darkred"), split.by = "Group2")

C$A<-row.names(C)

Idents(scRNA.1)=scRNA.1$group

B <- subset(scRNA.1, idents = c("Adjacent"))

library(GSVA)

Idents(B) <- "celltype"

genes <- unique(rownames(B@assays$RNA@counts))

aver_dt <- AverageExpression(B,

features = genes,

group.by = 'celltype',

slot = 'data')

aver_dt <- as.data.frame(aver_dt$RNA)

aver_dt <- aver_dt[rowSums(aver_dt)>0,]

library(GSEABase)

geneSets=getGmt("c2.cp.kegg_legacy.v2024.1.Hs.symbols-.gmt", geneIdType=SymbolIdentifier())

params <- gsvaParam(as.matrix(aver_dt), geneSets,

minSize = 1, maxSize = Inf,

kcdf = "Gaussian", tau = 1,

maxDiff = TRUE, absRanking = FALSE)

exp_gsva <- gsva(params, verbose = TRUE, BPPARAM = BiocParallel::SerialParam(progressbar = TRUE))

write.csv(exp_gsva,"Adjacent.csv")

Idents(scRNA.1)=scRNA.1$group

B <- subset(scRNA.1, idents = c("Tumor"))

library(GSVA)

Idents(B) <- "celltype"

genes <- unique(rownames(B@assays$RNA@counts))

aver_dt <- AverageExpression(B,

features = genes,

group.by = 'celltype',

slot = 'data')

aver_dt <- as.data.frame(aver_dt$RNA)

aver_dt <- aver_dt[rowSums(aver_dt)>0,]

library(GSEABase)

geneSets=getGmt("c2.cp.kegg_legacy.v2024.1.Hs.symbols-.gmt", geneIdType=SymbolIdentifier())

params <- gsvaParam(as.matrix(aver_dt), geneSets,

minSize = 1, maxSize = Inf,

kcdf = "Gaussian", tau = 1,

maxDiff = TRUE, absRanking = FALSE)

exp_gsva <- gsva(params, verbose = TRUE, BPPARAM = BiocParallel::SerialParam(progressbar = TRUE))

write.csv(exp_gsva,"Tumor.csv")

Idents(scRNA.1)=scRNA.1$group

B <- subset(scRNA.1, idents = c("Tumor"))

library(GSVA)

Idents(B) <- "celltype"

genes <- unique(rownames(B@assays$RNA@counts))

aver_dt <- AverageExpression(B,

features = genes,

group.by = 'celltype',

slot = 'data')

aver_dt <- as.data.frame(aver_dt$RNA)

aver_dt <- aver_dt[rowSums(aver_dt)>0,]

library(GSEABase)

geneSets=getGmt("c2.cp.kegg_legacy.v2024.1.Hs.symbols-.gmt", geneIdType=SymbolIdentifier())

params <- gsvaParam(as.matrix(aver_dt), geneSets,

minSize = 1, maxSize = Inf,

kcdf = "Gaussian", tau = 1,

maxDiff = TRUE, absRanking = FALSE)

exp_gsva <- gsva(params, verbose = TRUE, BPPARAM = BiocParallel::SerialParam(progressbar = TRUE))

write.csv(exp_gsva,"Tumor.csv")

scRNA.1<-scRNA_GSE189930

library(AUCell)

library(clusterProfiler)

cells_rankings <- AUCell_buildRankings(scRNA.1@assays$RNA@data)

Hallmarker <- read.gmt("c2.cp.kegg_legacy.v2024.1.Hs.symbols-.gmt")

geneSets <- lapply(unique(Hallmarker$term), function(x){print(x);Hallmarker$gene[Hallmarker$term == x]})

names(geneSets) <- unique(Hallmarker$term)

cells_AUC <- AUCell_calcAUC(geneSets, cells_rankings, aucMaxRank=nrow(cells_rankings)*0.1)

geneSet <- "Aminoacyl-tRNA biosynthesis"

aucs <- as.numeric(getAUC(cells_AUC)[geneSet, ])

scRNA.1$AUC <- aucs

library(ggraph)

p<-ggplot(data.frame(scRNA.1@meta.data, scRNA.1@reductions$umap@cell.embeddings), aes(UMAP_1, UMAP_2, color=AUC)

) + geom_point( size=1.5

) + scale_color_viridis(option="A") + theme_light(base_size = 15)+labs(title = "Aminoacyl-tRNA biosynthesis")+

theme(panel.border = element_rect(fill=NA,color="black", size=1, linetype="solid"))+

theme(plot.title = element_text(hjust = 0.5))

metadata1<-FetchData(scRNA.1,c("orig.ident","AUC","Cell","V1","ID","Sample","id","rigon","Group","celltype","rigon"))

write.csv(metadata1,".csv")

my_comparisons = list(c("Adjecent", "Tumor"))

pdf(file='.pdf',width = 7.5,height = 4)

ggboxplot(scRNA.1@meta.data, x="celltype", y="AUC",

fill="group",color = "black",

width = 0.6,

palette = c('#3C5488FF','#BB0021FF'),

bxp.errorbar=T,

bxp.errorbar.width=0.3,

size=0.5,

outlier.shape=NA,

legend = "right") +

theme(axis.text.x=element_text(size = 8, angle = 45, hjust = 1,vjust = 1),axis.title.x = element_blank(),

strip.background = element_blank(),

strip.text = element_text(size = 10)) +

labs(title = "", x="",y="Aminoacyl-tRNA biosynthesis") +

theme(panel.border = element_rect(colour = "black", fill=NA)) +

stat_compare_means(aes(group=group),

symnum.args=list(cutpoints=c(0, 0.001, 0.01, 0.05, 1),symbols=c("***", "**", "*", "ns")),label="p.signif")

dev.off()

scRNA.1$Nitro_group <- ifelse(scRNA.1$AUC>median(scRNA.1$AUC), 'High', 'Low')

Idents(scRNA.1) <- "Nitro_group"

CELLDEG <- FindMarkers(scRNA.1,ident.1 = 'High',ident.2 = 'Low',

verbose = FALSE, test.use = 'wilcox',

min.pct = 0.1,logfc.threshold = 0.1)

DEGs <- subset(CELLDEG, p_val < 0.05 & abs(avg_log2FC) > 0.25)

write.csv(DEGs,".csv")

exp <- B@assays$RNA@data[rownames(DEGs),] %>% t() %>% data.frame()

Nitro_score <- data.frame(Nitro_score = B$AUC)

identical(rownames(exp),rownames(Nitro_score))

cor_matrix <- cor(as.matrix(exp), as.matrix(Nitro_score),

use = "pairwise.complete.obs", method = "spearman") %>% data.frame()

cor_matrix <- cor_matrix %>% data.frame() %>%

dplyr::filter(abs(Nitro_score) > 0.1)

NRGs <- rownames(cor_matrix)

NRGs

DEGs_NRGs <- DEGs %>% dplyr::filter(rownames(DEGs) %in% NRGs)

save(DEGs, NRGs, DEGs_NRGs, cor_matrix, file = 'NRG.rda')

write.csv(NRGs,".csv")

write.csv(NRGs,".csv")

metadata<-FetchData(scRNA.1,"orig.ident")

metadata$Cell<-row.names(metadata)

patinets_metadata<-data.table::fread("cli.csv",header = TRUE)

metadata<-left_join(x=metadata,y=patinets_metadata,by="orig.ident")

row.names(metadata)<-metadata$Cell

scRNA.1<-AddMetaData(scRNA.1,metadata = metadata)

Idents(scRNA.1)= "celltype"

B <- subset(scRNA.1, idents = c("Macrophages"))

B <- NormalizeData(B, normalization.method = "LogNormalize", scale.factor = 1e4)

B <- FindVariableFeatures(B, selection.method = 'vst', nfeatures = 6000)

B <- ScaleData(B,rownames(B))

B <- RunPCA(B, features = VariableFeatures(object = B))

B <- FindNeighbors(B, dims = 1:10)

B <- FindClusters(B, resolution = 1)

head(Idents(B), 5)

table(B$seurat_clusters)

B <- RunUMAP(B, dims = 1:10)

pdf(file="B_regroup_UMAP.pdf")

DimPlot(B, reduction = 'umap')

dev.off()

saveRDS(B,'.rds')

DotPlot(B, features = c("IL7R","FOXP3","CCR7"))

DotPlot(B, features = c("GZMH","CD8B","CD8A"))

Idents(B)= "celltype"

DotPlot(B, features = c("Nos2","Tnf","Il1b","Cxcl9","Cxcl10"))

DotPlot(B, features = c("Arg1","Mrc1","Cd163","Retnla","Chil3"))

DotPlot(B, features = c("Tnf","Il1b","Cxcl9","Cxcl10","Arg1","Mrc1","Cd163"))

features = c("Tnf","Il1b","Cxcl9","Cxcl10","Arg1","Mrc1","Cd163")

p1 <- DotPlot(B, features = features,

assay='RNA' ) +

coord_flip() +

theme(panel.grid = element_blank(),

axis.text.x=element_text(angle = 45, hjust = 0.5,vjust=0.5))+

labs(x=NULL,y=NULL) +

guides(size = guide_legend("Percent Expression") )

library(SingleR)

load("ref_Mouse_all.RData")

refdata <- ref_Mouse

testdata <- GetAssayData(B, slot="data")

clusters <- B@meta.data$seurat_clusters

cellpred <- SingleR(test = testdata, ref = refdata, labels = refdata$label.main,

method = "cluster", clusters = clusters,

assay.type.test = "logcounts", assay.type.ref = "logcounts")

plotScoreHeatmap(cellpred )

celltype = data.frame(ClusterID=rownames(cellpred), celltype=cellpred$labels, stringsAsFactors = FALSE)

write.csv(celltype,"celltype_singleR-.csv",row.names = FALSE)

B@meta.data$celltype = "NA"

for(i in 1:nrow(celltype)){

B@meta.data[which(B@meta.data$seurat_clusters == celltype$ClusterID[i]),'celltype'] <- celltype$celltype[i]}

Idents(B)= "seurat_clusters"

DimPlot(B,reduction = "umap",label = T,group.by = 'seurat_clusters')

DimPlot(B,reduction = "umap",label = T,group.by = 'Group')

DimPlot(B, group.by="celltype", label=T, label.size=5)

celltype<-read.csv('celltype_singleR1.csv',header = T)

B@meta.data$celltype = "NA"

for(i in 1:nrow(celltype)){

B@meta.data[which(B@meta.data$seurat_clusters == celltype$ClusterID[i]),'celltype'] <- celltype$celltype[i]}

DimPlot(B, group.by="celltype", label=T, label.size=5)

saveRDS(B,'.rds')

DotPlot(B, features = c("Cd68","Cd80","Cd86","Hif1a","Nos2","Ccl5","Cxcl9","Stat1","Irf5"))

DotPlot(B, features = c("Cd163","Cd206","Cd209","Arg1","Pparg","Ccl17","Ccl22","Stat6","Klf4"))

celltype<-read.csv('celltype_singleR-.csv',header = T)

B@meta.data$celltype = "NA"

for(i in 1:nrow(celltype)){

B@meta.data[which(B@meta.data$seurat_clusters == celltype$ClusterID[i]),'celltype'] <- celltype$celltype[i]}

DimPlot(B, group.by="celltype", label=T, label.size=5)

macrophage <- subset(B, subset = Adgre1 > 1 & Cd68 > 1)

markers <- FindAllMarkers(macrophage, logfc.threshold = 0.2)

macrophage <- AddModuleScore(

macrophage,

features = list(

M1 = c("Nos2", "Il6", "Tnf","Ccl5","Cxcl9","Stat1","Irf5"),

M2 = c("Arg1", "Retnla", "Mrc1","Pparg","Ccl17","Ccl22","Stat6","Klf4")

),

name = "M_"

)

colnames(macrophage@meta.data)

Idents(macrophage)= "seurat_clusters"

DimPlot(macrophage,reduction = "umap",label = T,group.by = 'Group')

DimPlot(macrophage,reduction = "umap",label = T,group.by = 'seurat_clusters')

DimPlot(macrophage,reduction = "umap",label = T,group.by = 'Group')

DimPlot(macrophage, group.by="celltype", label=T, label.size=5)

head(macrophage@meta.data, 5)

FeaturePlot(macrophage, features = c("M_1", "M_2"))

module_scores <- macrophage@meta.data[, c("M_1", "M_2")]

write.csv(module_scores,".csv")

celltype=c('Glial','Glial','Glial','Glial','Glial',

'Glial','Glial','Glial','Glial')

names(celltype) <- levels(B)

B<- RenameIdents(B, celltype)

B@meta.data$celltype <- Idents(B)

cell = c('T cells','Hepatocyte',"Glial")

B$celltype <- factor(B$celltype,levels = cell)

Idents(B) <- B$celltype

B<- subset(B, celltype != 'Glial')

B@meta.data$celltype <- Idents(B)

table(B@meta.data$celltype)

library(scCustomize)

FeaturePlot_scCustom(seurat_object = B, features = c("Epcam"),

split.by = "group",num_columns = 1)

FeaturePlot(B, features = c("HLA-DQB1"), cols = c("lightblue", "white", "darkred"), split.by = "Group2")

saveRDS(B,'.rds')

Idents(B)= "seurat_clusters"

DimPlot(B,reduction = "umap",label = T,group.by = 'seurat_clusters')

DimPlot(B,reduction = "umap",label = T,group.by = 'group')

DimPlot(B, group.by="celltype", label=T, label.size=5)

gene_marker<-c("Cd4","Ccr7","Sell","Tcf7",

"Foxp3","Il2ra","Ctla4",

"Cd8a","Gzmb","Prf1",

"Pdcd1","Havcr2","Lag3",

"Klrb1c","Cd3d","Zbtb16","Epcam")

DotPlot(B,

features = gene_marker,

group.by = "seurat_clusters") + coord_flip()

celltype=c('CD8 T cells','CD4 T cells','CD4 T cells',"NKT",'CD4 T cells',

'Exhausted T cells','Exhausted T cells','Exhausted T cells',"Exhausted T cells","CD4 T cells",

'Glial','CD4 T cells','Glial',"Glial","CD4 T cells",

'Glial','Glial')

names(celltype) <- levels(B)

B<- RenameIdents(B, celltype)

B@meta.data$celltype <- Idents(B)

cell = c('M1',"Glial","M2","Others")

B$celltype <- factor(B$celltype,levels = cell)

Idents(B) <- B$celltype

B<- subset(B, celltype != 'Glial')

B@meta.data$celltype <- Idents(B)

saveRDS(B,'.rds')

library(scRNAtoolVis)

pdf(file=paste0('--.pdf'),width = 6,height = 4)

clusterCornerAxes(object = B, reduction = 'umap',

clusterCol = "celltype",

pSize = 0.3,

noSplit = F, groupFacet = 'Group',

cellLabel = F) +

scale_color_manual(values = cors)

dev.off()

scRNA=B

library(COSG)

marker_cosg <- cosg(

scRNA,

groups='all',

assay='RNA',

slot='data',

mu=1,

remove_lowly_expressed=TRUE,

expressed_pct=0.1,

n_genes_user=100

)

head(marker_cosg$names,3)

head(marker_cosg$scores,3)

all_markers <- marker_cosg$names

write.csv(all_markers,'all_celltype_markers.csv')

marker<-c()

for (group in colnames(marker_cosg$names)){

top_i<-marker_cosg$names[group][1,1]

marker<-c(marker,top_i)

}

features = gene_marker

features=c("Cd52","Ptpn18","Tmsb10")

library(tidydr)

library(ggrepel)

pdf(file=paste0('scRNA_celltype_FeaturePlot2.pdf'),width = 10,height = 6)

FeaturePlot(scRNA,features = features, ncol = 5,

cols = c('#333366',"#6666FF",'#CC3333','#FFCC33')) &

theme_bw() &

theme_void()

dev.off()

pdf(file=paste0('scRNA_celltype_vlnplot.pdf'),width = 6,height = 9)

VlnPlot(scRNA, features = features,

stack = TRUE,

sort = F,

cols = cors,

split.by = "celltype" ,

flip = TRUE,

split.plot = TRUE) +

theme(axis.text.x = element_text(size = 12,angle = 45,hjust = 1,vjust = 1),

axis.text.y = element_blank(),axis.ticks.y = element_blank(),

panel.grid.major = element_blank(),panel.grid.minor = element_blank(),

legend.position = "none") + labs(x=NULL,y=NULL)

dev.off()

metadata<-FetchData(scRNA,"orig.ident")

metadata$Cell<-row.names(metadata)

patinets_metadata<-data.table::fread("cli.csv",header = TRUE)

metadata<-left_join(x=metadata,y=patinets_metadata,by="orig.ident")

row.names(metadata)<-metadata$Cell

scRNA<-AddMetaData(scRNA,metadata = metadata)

names(scRNA@meta.data)

unique(scRNA$group)

Idents(scRNA) <- "group"

CELLDEG <- FindMarkers(scRNA,ident.1 = 'Con',ident.2 = 'OE',

verbose = FALSE, test.use = 'wilcox',

min.pct = 0.25,logfc.threshold = 0.5)

write.csv(CELLDEG, 'all_cell_DEG_Cone_OE.csv')

CELLDEG <- CELLDEG %>% arrange(avg_log2FC)

top10_DEG <- rbind(head(CELLDEG,10),tail(CELLDEG,10))

scRNA$celltype.group <- paste(scRNA$celltype, scRNA$group, sep = "_")

Idents(scRNA) <- "celltype.group"

CELLDEG <- FindMarkers(scRNA,ident.1 = 'Con_T cells',ident.2 = 'OE_T cells',

verbose = FALSE, test.use = 'wilcox',min.pct = 0.1)

cellfordeg <- levels(scRNA$celltype)

for(i in 1:length(cellfordeg)){

CELLDEG <- FindMarkers(scRNA, ident.1 = paste0(cellfordeg[i],'_Con'), ident.2 = paste0(cellfordeg[i],'_OE'),

only.pos = T, verbose = F)

CELLDEG$cluster <- cellfordeg[i]

write.csv(CELLDEG,paste0(cellfordeg[i],".csv"))

}

dir <- list.files(pattern = ".csv")

all_DEG <- lapply(dir, read.csv) %>% bind_rows()

colnames(all_DEG)[1] <- 'gene'

top5_DEG <- all_DEG %>% subset(p_val_adj < 0.05) %>%

group_by(cluster) %>% top_n(5, avg_log2FC)

top5_DEG <- top5_DEG[!duplicated(top5_DEG$gene),]

library(scRNAtoolVis)

pdf(file="scRNA_DEG_multivolcano11.pdf", width=14, height=7)

jjVolcano(diffData = all_DEG,

log2FC.cutoff = 0.5, topGeneN = 5,

aesCol = c('#3B4992FF','#BB0021FF')) +

scale_color_manual(values = cors) + scale_fill_manual(values = cors)

dev.off()

library(scRNAtoolVis)

Idents(scRNA) <- "celltype"

AverageHeatmap(object = scRNA,

markerGene = top10_DEG$gene,

clusterAnnoName = F,

row_title = "Cell-specific DEGs",

htCol = c("#3B4992FF", "white", "#DC0000FF"),

annoCol = TRUE, myanCol = cors[1:7])

Idents(scRNA) <- "group"

VlnPlot(scRNA,

features = "COX2",

split.by = "group",

pt.size = 0) +

geom_boxplot(width = 0.1, position = position_dodge(0.9)) +

theme(legend.position = "none")

scRNA=B

metadata<-FetchData(scRNA,"orig.ident")

metadata$Cell<-row.names(metadata)

patinets_metadata<-data.table::fread("cli.csv",header = TRUE)

metadata<-left_join(x=metadata,y=patinets_metadata,by="orig.ident")

row.names(metadata)<-metadata$Cell

scRNA<-AddMetaData(scRNA,metadata = metadata)

saveRDS(scRNA.1,'.rds')

library(reshape2)

library(ggplot2)

scRNA.1=scRNA

prop_df <- table(B$celltype,B$Group) %>% melt()

colnames(prop_df) <- c("Cluster","Group","Number")

prop_df$Cluster <- factor(prop_df$Cluster)

prop_df$Proportion <- ave(prop_df$Number, prop_df$Group,

FUN = function(x) x/sum(x))

prop_df <- arrange(prop_df,Cluster)

write.csv(prop_df,".csv",row.names = F)

ggplot(data = prop_df, aes(x = Number, y = Group, fill = Cluster)) +

geom_bar(stat = "identity", width=0.8,position="fill")+

scale_fill_manual(values=cors) +

coord_flip()+

theme_bw()+

theme(panel.grid =element_blank()) +

labs(x="Proportion",y="Group")+

theme(axis.text.y = element_text(size=12, colour = "black"),

axis.text.x = element_text(size=12, colour = "black"),

legend.title=element_blank(),

legend.text=element_text(size=12),

axis.text.x.bottom = element_text(hjust = 1, vjust = 1, angle = 45))

ggsave(".pdf",width = 3.5,height = 5)

ggplot(prop_df, aes(x = Cluster, y = Proportion, fill = group)) +

geom_col(position=position_dodge(0.8), width = 0.8)+

scale_fill_manual(values=c("#1f2d6f","#d5231d")) +

theme_bw()+

theme(panel.grid =element_blank()) +

labs(x="",y="Ratio")+

theme(axis.text.y = element_text(size=10, colour = "black"))+

theme(axis.text.x = element_text(size=10, colour = "black"))+

theme(axis.text.x.bottom = element_text(hjust = 1, vjust = 1, angle = 45))

Cellratio <- prop.table(table(Idents(scRNA), scRNA$sample), margin = 2)

Cellratio <- data.frame(Cellratio)

colnames(Cellratio) <- c('celltype','Sample','Freq')

Cellratio$group <- ifelse(grepl('SS',Cellratio$Sample),"Normal", "Tumor")

Cellratio$group <- factor(Cellratio$group,levels = c("Normal", "Tumor"))

my_comparisons <- list(c("Normal", "Tumor"))

pdf(file="scRNA_sample_proportion_boxplot.pdf", width=9, height=4.5)

ggboxplot(Cellratio, x="group", y="Freq",

fill="group",color = "black",

width = 0.6,

palette = c('#3C5488FF','#BB0021FF'),

bxp.errorbar=T,

bxp.errorbar.width=0.3,

size=0.5,

outlier.shape=NA,

legend = "right") +

geom_jitter(size=1) +

labs(title = "",y="Proportion") +

theme(axis.text.x=element_blank(),axis.ticks.x=element_blank(),axis.title.x=element_blank(),

strip.background = element_blank(),

strip.text = element_text(size = 10)) +

theme(panel.border = element_rect(colour = "black", fill=NA)) +

facet_wrap(~celltype, ncol=5, scales = "free_y") +

stat_compare_means(comparisons = my_comparisons, method = "t.test",

label='p.signif',hide.ns = T)

dev.off()

setwd("D:\\Download\\1.diannaozidai\\1.zhuomian\\7777777\\1.HCC\\1.Singlecell\\4.")

devtools::install_url('https://github.com/catboost/catboost/releases/download/v1.2.2/catboost-R-Windows-1.2.2.tgz')

install.packages("lightgbm")

library(caret)

library(dplyr)

library(catboost)

library(lightgbm)

library(DALEX)

library(doParallel)

library(ggplot2)

full_data <- read.csv('Hepatocytes_expression_filtered0.5.csv', header = TRUE, row.names = 1)

response_var <- "Group"

full_data$Group <- sub(".*_", "", rownames(full_data))

table(full_data$Group)

set.seed(12345)

train_idx <- createDataPartition(full_data$Group, p = 0.7, list = FALSE)

train_data <- full_data[train_idx, ]

test_data <- full_data[-train_idx, ]

cv_control <- trainControl(

method = "repeatedcv",

number = 5,

allowParallel = TRUE

)

cl <- makePSOCKcluster(detectCores() - 1)

registerDoParallel(cl)

feature_importance_list <- list()

top_features_per_model <- 10

gene_lists <- list()

model_settings <- data.frame(

AlgorithmName = c("RandomForest", "GradientBoosting", "Lasso",

"PLSModel", "DiscriminantModel",

"DecisionTree"),

Implementation = c("rf", "xgbTree", "glmnet",

"pls", "lda",

"rpart")

)

training_times <- numeric()

feature_importance_df <- data.frame()

compute_feature_importance <- function(model, data, response, model_name) {

explainer <- explain(

model = model,

data = data[, -which(names(data) == response)],

y = ifelse(data[[response]] == "DN", 1, 0),

label = model_name

)

importance <- variable_importance(

explainer,

type = "raw",

loss_function = loss_root_mean_square,

n_sample = min(500, nrow(data))

)

feature_importance <- importance[!grepl("_baseline_|_full_model_", importance$variable), ]

max_val <- max(feature_importance$dropout_loss)

min_val <- min(feature_importance$dropout_loss)

feature_importance$std_importance <- (feature_importance$dropout_loss - min_val) /

(max_val - min_val) * 100

feature_importance$model <- model_name

return(feature_importance)

}

total_start <- Sys.time()

cat("===== =====\n")

cat(paste(":", nrow(train_data), "\n"))

cat(paste(":", ncol(train_data)-1, "\n"))

for (idx in 1:nrow(model_settings)) {

algoName <- model_settings$AlgorithmName[idx]

algoImpl <- model_settings$Implementation[idx]

start_time <- Sys.time()

cat(sprintf("[%d/%d] : %s (%s)\n",

idx, nrow(model_settings), algoName, algoImpl))

tryCatch({

if (algoImpl == "xgbTree") {

trainedModel <- train(Group ~ ., data = train_data, method = algoImpl,

trControl = cv_control,

tuneGrid = expand.grid(

nrounds = 100,

max_depth = 3,

eta = 0.1,

gamma = 0,

colsample_bytree = 0.7,

min_child_weight = 1,

subsample = 0.7

))

} else {

trainedModel <- train(Group ~ ., data = train_data, method = algoImpl,

trControl = cv_control)

}

model_time <- round(difftime(Sys.time(), start_time, units = "secs"), 1)

cat(sprintf(" (%.1f)\n", model_time))

cat(" ...\n")

feat_importance <- compute_feature_importance(

trainedModel, train_data, "Group", algoName

)

feature_importance_list[[algoName]] <- feat_importance

top_features <- feat_importance %>%

group_by(variable) %>%

summarise(mean_importance = mean(std_importance, na.rm = TRUE)) %>%

arrange(desc(mean_importance)) %>%

head(top_features_per_model)

gene_lists[[algoName]] <- as.character(top_features$variable)

feature_importance_df <- rbind(feature_importance_df, data.frame(

Feature = top_features$variable,

Importance = top_features$mean_importance,

Model = algoName

))

training_times[algoName] <- as.numeric(model_time)

write.csv(feat_importance,

file = sprintf("Feature_importance_%s.csv", algoName),

row.names = FALSE)

write.table(top_features$variable,

file = sprintf("Top_genes_%s.txt", algoName),

row.names = FALSE, col.names = FALSE, quote = FALSE)

}, error = function(e) {

error_time <- round(difftime(Sys.time(), start_time, units = "secs"), 1)

cat(sprintf(" : %s (%.1f)\n", e$message, error_time))

training_times[algoName] <- error_time

})

cat(sprintf(" : %d/%d | : %.1f\n\n",

idx, nrow(model_settings),

difftime(Sys.time(), total_start, units = "mins")))

}

cat("\n===== CatBoost =====\n")

start_time_cb <- Sys.time()

tryCatch({

train_features <- train_data[, -which(names(train_data) == response_var)]

train_labels <- ifelse(train_data[[response_var]] == "DN", 1, 0)

test_features <- test_data[, -which(names(test_data) == response_var)]

test_labels <- test_data$Group

test_labels <- ifelse(test_labels == 'Control', 0, 1)

train_pool <- catboost.load_pool(data = train_features, label = train_labels)

test_pool <- catboost.load_pool(data = test_features, label = as.numeric(test_labels))

catboost_params <- list(

iterations = 500,

learning_rate = 0.05,

depth = 6,

loss_function = 'Logloss',

eval_metric = 'AUC',

verbose = 100,

random_seed = 42,

early_stopping_rounds = 50

)

cb_model <- catboost.train(

learn_pool = train_pool,

test_pool = test_pool,

params = catboost_params

)

feat_imp <- catboost.get_feature_importance(cb_model, pool = catboost.load_pool(train_features))

feat_importance_cb <- data.frame(

variable = colnames(train_features),

dropout_loss = feat_imp,

std_importance = (feat_imp - min(feat_imp)) / (max(feat_imp) - min(feat_imp)) * 100,

model = "CatBoost"

)

feature_importance_list[["CatBoost"]] <- feat_importance_cb

top_features_cb <- feat_importance_cb %>%

arrange(desc(std_importance)) %>%

head(top_features_per_model) %>%

pull(variable)

gene_lists[["CatBoost"]] <- as.character(top_features_cb)

write.csv(feat_importance_cb, "Feature_importance_CatBoost.csv", row.names = FALSE)

write.table(top_features_cb, "Top_genes_CatBoost.txt",

row.names = FALSE, col.names = FALSE, quote = FALSE)

cb_time <- as.numeric(difftime(Sys.time(), start_time_cb, units = "secs"))

training_times[["CatBoost"]] <- cb_time

cat(sprintf(" CatBoost | : %.1f\n", cb_time))

}, error = function(e) {

cb_time <- as.numeric(difftime(Sys.time(), start_time_cb, units = "secs"))

training_times[["CatBoost"]] <- cb_time

cat(sprintf(" CatBoost: %s | : %.1f\n", e$message, cb_time))

})

cat("\n===== LightGBM =====\n")

start_time_lgb <- Sys.time()

tryCatch({

train_features_lgb <- train_data[, -which(names(train_data) == response_var)]

train_labels_lgb <- ifelse(train_data[[response_var]] == "DN", 1, 0)

test_features_lgb <- test_data[, -which(names(test_data) == response_var)]

test_labels_lgb <- test_data$Group

test_labels_lgb <- ifelse(test_labels_lgb == 'Control', 0, 1)

categorical_cols <- names(train_features_lgb)[sapply(train_features_lgb, is.factor)]

train_matrix_lgb <- as.matrix(train_features_lgb)

test_matrix_lgb <- as.matrix(test_features_lgb)

dtrain_lgb <- lgb.Dataset(

data = train_matrix_lgb,

label = train_labels_lgb,

categorical_feature = categorical_cols

)

dtest_lgb <- lgb.Dataset(

data = test_matrix_lgb,

label = test_labels_lgb,

reference = dtrain_lgb,

categorical_feature = categorical_cols

)

lgb_params <- list(

objective = "binary",

metric = "auc",

num_leaves = 31,

learning_rate = 0.05,

feature_fraction = 0.8,

bagging_fraction = 0.8,

bagging_freq = 5,

max_depth = 6,

verbosity = -1,

seed = 42

)

lgb_model <- lgb.train(

params = lgb_params,

data = dtrain_lgb,

valids = list(test = dtest_lgb),

nrounds = 500,

early_stopping_rounds = 50,

eval_freq = 10

)

feat_imp <- lgb.importance(lgb_model, percentage = TRUE)

feat_importance_lgb <- data.frame(

variable = feat_imp$Feature,

dropout_loss = feat_imp$Gain * 100,

std_importance = feat_imp$Gain * 100,

model = "LightGBM"

)

feature_importance_list[["LightGBM"]] <- feat_importance_lgb

top_features_lgb <- feat_imp %>%

arrange(desc(Gain)) %>%

head(top_features_per_model) %>%

pull(Feature)

gene_lists[["LightGBM"]] <- as.character(top_features_lgb)

write.csv(feat_importance_lgb, "Feature_importance_LightGBM.csv", row.names = FALSE)

write.table(top_features_lgb, "Top_genes_LightGBM.txt",

row.names = FALSE, col.names = FALSE, quote = FALSE)

lgb_time <- as.numeric(difftime(Sys.time(), start_time_lgb, units = "secs"))

training_times[["LightGBM"]] <- lgb_time

cat(sprintf(" LightGBM | : %.1f\n", lgb_time))

}, error = function(e) {

lgb_time <- as.numeric(difftime(Sys.time(), start_time_lgb, units = "secs"))

training_times[["LightGBM"]] <- lgb_time

cat(sprintf(" LightGBM: %s | : %.1f\n", e$message, lgb_time))

})

stopCluster(cl)

total_time <- round(difftime(Sys.time(), total_start, units = "mins"), 1)

cat(sprintf("\n===== ! : %.1f =====\n", total_time))

write.csv(data.frame(

Model = names(training_times),

Seconds = unname(training_times)

), "1_Model_training_times.csv", row.names = FALSE)

cat("\n===== 8 =====\n")

for (model_name in names(gene_lists)) {

cat(sprintf("\n%s %d:\n", model_name, top_features_per_model))

cat(paste(gene_lists[[model_name]], collapse = "\n"))

write.table(gene_lists[[model_name]],

file = sprintf("top_genes_%s.txt", model_name),

row.names = FALSE, col.names = FALSE, quote = FALSE)

}

if (nrow(feature_importance_df) > 0) {

feature_summary <- feature_importance_df %>%

group_by(Feature) %>%

summarise(

MeanImportance = mean(Importance, na.rm = TRUE),

ModelCount = n_distinct(Model)

) %>%

arrange(desc(MeanImportance))}

write.csv(feature_summary, "2_Feature_importance_summary.csv", row.names = FALSE)

mean_imp_plot <- feature_summary %>%

arrange(desc(MeanImportance)) %>%

head(20) %>%

ggplot(aes(x = reorder(Feature, MeanImportance), y = MeanImportance)) +

geom_col(fill = "#1f77b4", alpha = 0.8) +

geom_text(aes(label = round(MeanImportance, 1)),

hjust = -0.2, size = 3, color = "black") +

coord_flip() +

labs(title = "Top 20 Features by Mean Importance",

x = "Feature",

y = "Mean Importance Score") +

theme_minimal() +

theme(

plot.title = element_text(hjust = 0.5, face = "bold", size = 14),

axis.title = element_text(size = 12),

axis.text = element_text(size = 10),

panel.grid.major.y = element_blank()

) +

scale_y_continuous(expand = expansion(mult = c(0, 0.1)))

mean_imp_plot

ggsave('3_feature_selection_by_mean_importance.pdf', width = 5.33, height = 4.33)

model_count_plot <- feature_summary %>%

arrange(desc(ModelCount)) %>%

head(20) %>%

ggplot(aes(x = reorder(Feature, ModelCount), y = ModelCount)) +

geom_col(fill = "#ff7f0e", alpha = 0.8) +

geom_text(aes(label = ModelCount),

hjust = -0.2, size = 3, color = "black") +

coord_flip() +

labs(title = "Top 20 Features by Model Consensus",

x = "Feature",

y = "Number of Models Selecting Feature") +

theme_minimal() +

theme(

plot.title = element_text(hjust = 0.5, face = "bold", size = 14),

axis.title = element_text(size = 12),

axis.text = element_text(size = 10),

panel.grid.major.y = element_blank()

) +

scale_y_continuous(expand = expansion(mult = c(0, 0.1)),

breaks = function(x) seq(0, max(x), by = 1))

model_count_plot

ggsave('4_feature_selection_by_counts.pdf', width = 5.33, height = 4.33)

library(UpSetR)

upset_plot <- upset(

fromList(gene_lists),

nsets = length(gene_lists),

nintersects = 20,

sets = names(gene_lists),

mb.ratio = c(0.6, 0.4),

order.by = "freq",

decreasing = TRUE,

point.size = 3.5,

line.size = 1,

mainbar.y.label = "Number of intersected gene",

sets.x.label = "Gene number in each model",

text.scale = c(1.3, 1.3, 1, 1, 1.5, 1)

)

dev.off()

pdf("5_feature_selection_by_upset_plot.pdf", width = 10.66, height = 4.84)

print(upset_plot)

dev.off()

library(tidyverse)

library(ComplexHeatmap)

all_genes <- unique(unlist(gene_lists))

gene_matrix <- matrix(0, nrow = length(gene_lists), ncol = length(all_genes),

dimnames = list(names(gene_lists), all_genes))

for (model in names(gene_lists)) {

gene_matrix[model, gene_lists[[model]]] <- 1

}

gene_df <- t(as.data.frame(gene_matrix))

gene_df <- gene_df[order(rowSums(gene_df), decreasing = TRUE), ]

gene_df <- gene_df[, order(colSums(gene_df), decreasing = TRUE)]

model_abbr <- c(

"RandomForest" = "RF",

"GradientBoosting" = "GBM",

"Lasso" = "Lasso",

"PLSModel" = "PLS",

"DiscriminantModel" = "LDA",

"DecisionTree" = "DT",

"CatBoost" = "CatB",

"LightGBM" = "LGBM"

)

colnames(gene_df) <- model_abbr[colnames(gene_df)]

pdf('6_feature_selection_by_dotplot.pdf', width = 5.43, height = 12)

Heatmap(

as.matrix(gene_df),

name = "pvalue",

rect_gp = gpar(type = "none"),

cluster_rows = FALSE,

cluster_columns = FALSE,

show_heatmap_legend = FALSE,

cell_fun = function(j, i, x, y, width, height, fill) {

val <- gene_df[i, j]

grid.points(

x = x, y = y, pch = 16,

size = unit(4, "mm"),

gp = gpar(col = ifelse(val == 1, "red", "grey"))

)

},

right_annotation = rowAnnotation(

Count = anno_barplot(rowSums(gene_df), gp = gpar(fill = "grey50"), border = FALSE),

show_annotation_name = FALSE

),

top_annotation = HeatmapAnnotation(

Model = anno_text(colnames(gene_df),

location = 0.5,

just = "center",

gp = gpar(fontsize = 10, fontface = "bold"),

rot = 0),

show_annotation_name = FALSE

),

row_names_side = "left",

row_names_gp = gpar(fontsize = 10),

row_names_max_width = unit(12, "cm"),

show_column_names = FALSE,

column_title = "Feature Selection Enrichment Dotplot",

column_title_gp = gpar(fontsize = 12),

column_title_side = "top"

)

legend_dot <- Legend(

labels = c("Selected", "Not_selected"),

type = "points",

pch = 16,

legend_gp = gpar(col = c("red", "grey")),

title = "Color"

)

dev.off()

cat("\n===== ! =====\n")
